# Supplementary material
Source: PubMed Central journal article supplement (PMC5536851)

## **SUPPLEMENTAL MATERIAL**

### **Predicted Atherosclerotic Cardiovascular Disease Risk and Masked Hypertension Among African Americans in the Jackson Heart Study**

Short title: Cardiovascular disease risk and masked hypertension

D. Edmund Anstey, MD<sup>1</sup>, John N. Booth, III<sup>2</sup>, MS, Marwah Abdalla, MD, MPH<sup>1</sup>, Tanya M. Spruill, PhD<sup>3</sup>, Yuan-I Min, PhD<sup>4</sup>, Paul Muntner<sup>2</sup>, PhD, Daichi Shimbo, MD<sup>1</sup>

<sup>1</sup>Columbia University Medical Center, New York, New York

<sup>2</sup>University of Alabama at Birmingham, Birmingham, Alabama

<sup>3</sup>New York University School of Medicine, New York, New York

<sup>4</sup>School of Medicine, University of Mississippi Medical Center, Jackson, Mississippi

**SUPPLEMENTAL TABLES**

**Supplemental Table 1.** Clinic and ambulatory blood pressure levels among Jackson Heart Study participants by category of 10-year predicted atherosclerotic cardiovascular risk.

|                    | 10-year predicted ASCVD risk category |              |               |              | p-trend |
|--------------------|---------------------------------------|--------------|---------------|--------------|---------|
|                    | <5%                                   | ≥5% to <7.5% | ≥7.5% to <10% | ≥10%         |         |
|                    | (n=212)                               | (n=93)       | (n=74)        | (n=265)      |         |
| <b>SBP, mmHg</b>   |                                       |              |               |              |         |
| Clinic SBP         | 117.3 ± 10.2                          | 121.2 ± 9.5  | 122.5 ± 10.6  | 125.9 ± 9.3  | <0.001  |
| Daytime SBP        | 121.9 ± 9.7                           | 125.9 ± 10.9 | 126.7 ± 10.1  | 131.2 ± 12.4 | <0.001  |
| Nighttime SBP      | 111.7 ± 11.4                          | 116.3 ± 13.2 | 118.0 ± 11.0  | 123.0 ± 15.1 | <0.001  |
| 24-hour SBP        | 117.8 ± 9.7                           | 122.3 ± 10.8 | 123.7 ± 9.9   | 128.0 ± 12.5 | <0.001  |
| <b>DBP, mmHg</b>   |                                       |              |               |              |         |
| Clinic DBP         | 74.2 ± 7.7                            | 73.5 ± 7.5   | 72.5 ± 8.0    | 72.3 ± 6.9   | 0.003   |
| Daytime DBP        | 77.7 ± 8.4                            | 77.2 ± 7.7   | 76.6 ± 8.3    | 77.2 ± 9.5   | 0.473   |
| Nighttime DBP      | 66.4 ± 8.7                            | 66.2 ± 9.1   | 68.2 ± 8.5    | 68.3 ± 10.1  | 0.015   |
| 24-hour DBP        | 73.2 ± 8.0                            | 72.7 ± 7.5   | 73.5 ± 7.9    | 73.5 ± 9.0   | 0.553   |
| Prehypertension, % | 47.2%                                 | 61.3%        | 64.9%         | 77.4%        | <0.001  |

The numbers in the table are mean ± standard deviation or percentages.

ASCVD: Atherosclerotic cardiovascular disease

SBP: systolic blood pressure

DBP: diastolic blood pressure

**Supplemental Table 2.** Characteristics and clinic and ambulatory blood pressure among Jackson Heart Study participants by category of 10-year predicted atherosclerotic cardiovascular risk stratified by those not taking antihypertensive medication (upper panel) and those taking antihypertensive medication (lower panel).

|                                                            | 10-year predicted ASCVD risk category |              |              | p-trend |
|------------------------------------------------------------|---------------------------------------|--------------|--------------|---------|
|                                                            | <5%                                   | ≥5% to <7.5% | ≥7.5%        |         |
| <b>Participants not taking antihypertensive medication</b> |                                       |              |              |         |
|                                                            | (n=159)                               | (n=45)       | (n=101)      |         |
| Age, years                                                 | 49.3 ± 6.1                            | 57.0 ± 6.1   | 66.0 ± 6.4   | <0.001  |
| Male, %                                                    | 18.2%                                 | 62.2%        | 51.5%        | <0.001  |
| Less than high school education, %                         | 4.4%                                  | 17.8%        | 21.8%        | <0.001  |
| Current smoking, %                                         | 6.9%                                  | 4.4%         | 13.9%        | 0.074   |
| Diabetes, %                                                | 1.9%                                  | 4.4%         | 26.7%        | <0.001  |
| eGFR < 60 ml/min/m <sup>2</sup> , %                        | 0.0%                                  | 2.2%         | 8.9%         | 0.014   |
| Body mass index, kg/m <sup>2</sup>                         | 30.7 ± 7.6                            | 29.8 ± 6.0   | 29.8 ± 5.0   | 0.254   |
| Total cholesterol, mg/dL                                   | 198.2 ± 36.5                          | 206.5 ± 34.4 | 216.8 ± 42.0 | <0.001  |
| LDL cholesterol, mg/dL                                     | 124.3 ± 35.9                          | 136.7 ± 33.2 | 139.8 ± 36.6 | <0.001  |
| HDL cholesterol, mg/dL                                     | 55.5 ± 13.2                           | 49.4 ± 12.9  | 55.6 ± 16.2  | 0.832   |
| <b>SBP, mmHg</b>                                           |                                       |              |              |         |
| Clinic SBP                                                 | 116.9 ± 10.5                          | 120.1 ± 9.6  | 126.1 ± 8.4  | <0.001  |
| Daytime SBP                                                | 121.5 ± 9.4                           | 127.3 ± 10.2 | 130.4 ± 11.1 | <0.001  |
| Nighttime SBP                                              | 111.4 ± 10.7                          | 117.0 ± 12.9 | 120.8 ± 13.5 | <0.001  |
| 24-hour SBP                                                | 117.4 ± 9.4                           | 123.5 ± 10.6 | 126.8 ± 11.4 | <0.001  |
| <b>DBP, mmHg</b>                                           |                                       |              |              |         |
| Clinic DBP                                                 | 74.0 ± 7.6                            | 73.4 ± 8.2   | 72.2 ± 6.0   | 0.060   |
| Daytime DBP                                                | 77.3 ± 8.4                            | 79.1 ± 6.9   | 77.4 ± 8.7   | 0.824   |
| Nighttime DBP                                              | 66.1 ± 8.2                            | 68.6 ± 9.1   | 68.6 ± 8.7   | 0.016   |
| 24-hour DBP                                                | 72.8 ± 7.9                            | 74.8 ± 7.1   | 73.9 ± 7.9   | 0.226   |
| Prehypertension, %                                         | 47.2%                                 | 57.8%        | 80.2%        | <0.001  |
| <b>Participants taking antihypertensive medication</b>     |                                       |              |              |         |
|                                                            | (n=53)                                | (n=48)       | (n=238)      |         |
| Age, years                                                 | 50.6 ± 5.9                            | 58.5 ± 7.2   | 65.0 ± 7.2   | <0.001  |
| Male, %                                                    | 1.9%                                  | 6.3%         | 33.6%        | <0.001  |
| Less than high school education, %                         | 11.3%                                 | 20.8%        | 19.9%        | 0.209   |
| Current smoking, %                                         | 1.9%                                  | 10.4%        | 8.0%         | 0.234   |
| Diabetes, %                                                | 1.9%                                  | 8.3%         | 37.8%        | <0.001  |
| eGFR < 60 ml/min/m <sup>2</sup> , %                        | 0.0%                                  | 8.3%         | 16.0%        | 0.004   |
| Body mass index, kg/m <sup>2</sup>                         | 32.6 ± 7.4                            | 33.4 ± 5.7   | 31.1 ± 5.7   | 0.034   |
| Total cholesterol, mg/dL                                   | 192.8 ± 32.2                          | 193.7 ± 37.3 | 203.2 ± 40.9 | 0.041   |
| LDL cholesterol, mg/dL                                     | 115.0 ± 31.5                          | 115.4 ± 36.6 | 126.1 ± 35.2 | 0.015   |
| HDL cholesterol, mg/dL                                     | 60.3 ± 19.5                           | 56.1 ± 15.1  | 53.8 ± 13.6  | 0.004   |

|                    |              |              |              |        |
|--------------------|--------------|--------------|--------------|--------|
| SBP, mmHg          |              |              |              |        |
| Clinic SBP         | 118.4 ± 9.3  | 122.3 ± 9.4  | 124.8 ± 10.2 | <0.001 |
| Daytime SBP        | 123.0 ± 10.6 | 124.5 ± 11.4 | 130.1 ± 12.5 | <0.001 |
| Nighttime SBP      | 112.7 ± 13.3 | 115.7 ± 13.6 | 122.4 ± 14.9 | <0.001 |
| 24-hour SBP        | 119.0 ± 10.6 | 121.2 ± 10.9 | 127.2 ± 12.4 | <0.001 |
| DBP, mmHg          |              |              |              |        |
| Clinic DBP         | 74.9 ± 8.0   | 73.7 ± 6.9   | 72.3 ± 7.6   | 0.018  |
| Daytime DBP        | 79.1 ± 8.5   | 75.4 ± 8.0   | 76.9 ± 9.4   | 0.262  |
| Nighttime DBP      | 67.3 ± 10.1  | 64.0 ± 8.6   | 68.1 ± 10.2  | 0.216  |
| 24-hour DBP        | 74.4 ± 8.2   | 70.7 ± 7.3   | 73.4 ± 9.1   | 0.911  |
| Prehypertension, % | 47.2%        | 64.6%        | 72.3%        | <0.001 |

The numbers in the table are mean ± standard deviation or percentages.

ASCVD: Atherosclerotic cardiovascular disease

eGFR: estimated glomerular filtration rate

HDL: high-density lipoprotein

LDL: low-density lipoprotein

SBP: systolic blood pressure

DBP: diastolic blood pressure

**Supplemental Table 3.** Prevalence and prevalence ratios for masked hypertension by category of 10-year predicted atherosclerotic cardiovascular disease risk among participants not taking antihypertensive medication (upper panel) and taking antihypertensive medication (bottom panel).

|                                                            | 10-year predicted ASCVD risk category |                    |                    |         |
|------------------------------------------------------------|---------------------------------------|--------------------|--------------------|---------|
|                                                            | <5%                                   | ≥5% to <7.5%       | ≥7.5%              | p-trend |
| <b>Participants not taking antihypertensive medication</b> | (n=159)                               | (n=45)             | (n=101)            |         |
|                                                            | Prevalence                            |                    |                    |         |
| Any masked hypertension                                    | 35.2%                                 | 62.2%              | 63.4%              | <0.001  |
| Masked daytime hypertension                                | 20.1%                                 | 31.1%              | 37.6%              | 0.002   |
| Masked nighttime hypertension                              | 33.3%                                 | 53.3%              | 61.4%              | <0.001  |
| Masked 24-hour hypertension                                | 22.0%                                 | 40.0%              | 46.5%              | <0.001  |
|                                                            | Unadjusted prevalence ratio (95% CI)  |                    |                    |         |
| Any masked hypertension                                    | 1 (ref)                               | 1.60 (1.13 - 2.27) | 1.84 (1.41 - 2.41) | <0.001  |
| Masked daytime hypertension                                | 1 (ref)                               | 1.55 (0.91 - 2.64) | 1.87 (1.25 - 2.79) | 0.002   |
| Masked nighttime hypertension                              | 1 (ref)                               | 1.77 (1.30 - 2.41) | 1.80 (1.39 - 2.33) | <0.001  |
| Masked 24-hour hypertension                                | 1 (ref)                               | 1.82 (1.14 - 2.88) | 2.11 (1.48 - 3.03) | <0.001  |
|                                                            | Adjusted prevalence ratio (95% CI)*   |                    |                    |         |
| Any masked hypertension                                    | 1 (ref)                               | 1.62 (1.07 - 2.46) | 1.94 (1.22 - 3.10) | 0.006   |
| Masked daytime hypertension                                | 1 (ref)                               | 1.49 (0.79 - 2.80) | 1.88 (0.97 - 3.67) | 0.064   |
| Masked nighttime hypertension                              | 1 (ref)                               | 1.85 (1.27 - 2.71) | 2.09 (1.35 - 3.23) | 0.001   |
| Masked 24-hour hypertension                                | 1 (ref)                               | 2.12 (1.22 - 3.66) | 2.65 (1.48 - 4.76) | 0.001   |
| <b>Participants taking antihypertensive medication</b>     | (n=53)                                | (n=48)             | (n=238)            |         |
|                                                            | Prevalence                            |                    |                    |         |
| Any masked hypertension                                    | 47.2%                                 | 39.6%              | 65.5%              | 0.001   |
| Masked daytime hypertension                                | 22.6%                                 | 22.9%              | 40.3%              | 0.004   |
| Masked nighttime hypertension                              | 41.5%                                 | 31.3%              | 59.2%              | 0.002   |
| Masked 24-hour hypertension                                | 20.8%                                 | 16.7%              | 44.1%              | <0.001  |
|                                                            | Unadjusted prevalence ratio (95% CI)  |                    |                    |         |
| Any masked hypertension                                    | 1 (ref)                               | 0.75 (0.44 - 1.28) | 1.43 (1.02 - 2.00) | 0.006   |

|                               |                                     |                    |                    |        |
|-------------------------------|-------------------------------------|--------------------|--------------------|--------|
| Masked daytime hypertension   | 1 (ref)                             | 1.01 (0.49 - 2.08) | 1.78 (1.06 - 3.00) | 0.009  |
| Masked nighttime hypertension | 1 (ref)                             | 0.84 (0.53 - 1.32) | 1.39 (1.03 - 1.87) | 0.005  |
| Masked 24-hour hypertension   | 1 (ref)                             | 0.80 (0.35 - 1.83) | 2.13 (1.23 - 3.67) | <0.001 |
|                               | Adjusted prevalence ratio (95% CI)* |                    |                    |        |
| Any masked hypertension       | 1 (ref)                             | 0.72 (0.43 - 1.22) | 1.21 (0.81 - 1.81) | 0.154  |
| Masked daytime hypertension   | 1 (ref)                             | 1.30 (0.63 - 2.67) | 2.14 (1.17 - 3.94) | 0.008  |
| Masked nighttime hypertension | 1 (ref)                             | 0.89 (0.57 - 1.40) | 1.38 (0.96 - 1.98) | 0.031  |
| Masked 24-hour hypertension   | 1 (ref)                             | 0.84 (0.37 - 1.90) | 1.86 (1.02 - 3.39) | 0.015  |

ASCVD: Atherosclerotic cardiovascular disease

CI: Confidence interval

\*Adjusted for age, sex, body mass index, less than high school education, and estimated glomerular filtration rate <60 ml/min/m<sup>2</sup>

**Supplemental Table 4.** Distribution of 10-year predicted atherosclerotic cardiovascular disease risk categories among Jackson Heart Study participants with and without masked hypertension.

| ASCVD risk category | Type of masked hypertension |       |         |       |           |       |         |       |
|---------------------|-----------------------------|-------|---------|-------|-----------|-------|---------|-------|
|                     | Any                         |       | Daytime |       | Nighttime |       | 24-hour |       |
|                     | No                          | Yes   | No      | Yes   | No        | Yes   | No      | Yes   |
|                     | n=441                       | n=203 | n=327   | n=317 | n=420     | n=224 | n=296   | n=348 |
| <5%                 | 44.3%                       | 23.3% | 38.1%   | 21.7% | 41.9%     | 23.7% | 39.5%   | 20.5% |
| ≥5% to <7.5%        | 15.5%                       | 13.5% | 15.4%   | 12.3% | 16.5%     | 12.3% | 16.0%   | 11.6% |
| ≥7.5% to <10%       | 10.5%                       | 12.4% | 11.6%   | 11.3% | 10.7%     | 12.3% | 11.4%   | 11.6% |
| ≥10%                | 29.7%                       | 50.9% | 34.9%   | 54.7% | 30.9%     | 51.7% | 33.1%   | 56.3% |

ASCVD: Atherosclerotic cardiovascular disease

**Supplemental Table 5.** Prevalence of 10-year predicted atherosclerotic cardiovascular disease risk categories among participants with and without masked hypertension stratified by those not taking antihypertensive medication (upper panel) and those taking antihypertensive medication (lower panel).

|                     | Type of masked hypertension                          |       |         |       |           |       |         |       |
|---------------------|------------------------------------------------------|-------|---------|-------|-----------|-------|---------|-------|
|                     | Any                                                  |       | Daytime |       | Nighttime |       | 24-hour |       |
|                     | No                                                   | Yes   | No      | Yes   | No        | Yes   | No      | Yes   |
| ASCVD risk category | Participants not taking antihypertensive medications |       |         |       |           |       |         |       |
|                     | n=221                                                | n=84  | n=166   | n=139 | n=205     | n=100 | n=157   | n=148 |
| <5%                 | 57.5%                                                | 38.1% | 63.9%   | 38.1% | 60.5%     | 35.0% | 65.6%   | 37.8% |
| ≥5% to <7.5%        | 14.0%                                                | 16.7% | 12.7%   | 17.3% | 13.2%     | 18.0% | 10.8%   | 18.9% |
| ≥7.5%               | 28.5%                                                | 45.2% | 23.5%   | 44.6% | 26.3%     | 47.0% | 23.6%   | 43.2% |
| ASCVD risk category | Participants taking antihypertensive medications     |       |         |       |           |       |         |       |
|                     | n=220                                                | n=119 | n=161   | n=178 | n=215     | n=124 | n=139   | n=200 |
| <5%                 | 18.6%                                                | 10.1% | 19.3%   | 12.4% | 19.5%     | 8.9%  | 20.1%   | 12.5% |
| ≥5% to <7.5%        | 16.8%                                                | 9.2%  | 20.5%   | 8.4%  | 18.6%     | 6.5%  | 20.9%   | 9.5%  |
| ≥7.5%               | 64.5%                                                | 80.7% | 60.2%   | 79.2% | 61.9%     | 84.7% | 59.0%   | 78.0% |

ASCVD: Atherosclerotic cardiovascular disease



**Supplemental Table 6.** Prevalence and prevalence ratios for masked hypertension by category of atherosclerotic cardiovascular disease risk among Jackson Heart Study participants with normal clinic blood pressure (upper panel) and with prehypertension (upper panel).

|                                                             | 10-year predicted ASCVD risk category |                    |                    |                     | p-trend |
|-------------------------------------------------------------|---------------------------------------|--------------------|--------------------|---------------------|---------|
|                                                             | <5%                                   | ≥5% to <7.5%       | ≥7.5% to <10%      | ≥10%                |         |
| <b>Among participants with normal clinic blood pressure</b> | n=112                                 | n=36               | n=26               | n=60                |         |
|                                                             | Prevalence                            |                    |                    |                     |         |
| Any masked hypertension                                     | 25.9%                                 | 44.4%              | 46.2%              | 53.3%               | <0.001  |
| Masked daytime hypertension                                 | 8.9%                                  | 22.2%              | 23.1%              | 23.3%               | 0.001   |
| Masked nighttime hypertension                               | 23.2%                                 | 33.3%              | 38.5%              | 50.0%               | <0.001  |
| Masked 24-hour hypertension                                 | 9.8%                                  | 22.2%              | 23.1%              | 30.0%               | 0.001   |
|                                                             | Unadjusted prevalence ratio (95% CI)  |                    |                    |                     |         |
| Any masked hypertension                                     | 1 (ref)                               | 1.72 (1.06 - 2.78) | 1.78 (1.06 - 3.00) | 2.06 (1.39 - 3.05)  | <0.001  |
| Masked daytime hypertension                                 | 1 (ref)                               | 2.49 (1.06 - 5.83) | 2.58 (1.03 - 6.47) | 2.61 (1.24 - 5.52)  | 0.007   |
| Masked nighttime hypertension                               | 1 (ref)                               | 1.44 (0.81 - 2.54) | 1.66 (0.92 - 2.99) | 2.15 (1.41 - 3.28)  | <0.001  |
| Masked 24-hour hypertension                                 | 1 (ref)                               | 2.26 (0.99 - 5.19) | 2.35 (0.96 - 5.77) | 3.05 (1.55 - 6.04)  | <0.001  |
|                                                             | Adjusted prevalence ratio (95% CI)*   |                    |                    |                     |         |
| Any masked hypertension                                     | 1 (ref)                               | 1.73 (1.01 - 2.97) | 1.88 (1.00 - 3.54) | 2.22 (1.24 - 3.99)  | 0.015   |
| Masked daytime hypertension                                 | 1 (ref)                               | 2.73 (0.97 - 7.69) | 2.72 (0.82 - 8.98) | 3.35 (1.02 - 11.01) | 0.109   |
| Masked nighttime hypertension                               | 1 (ref)                               | 1.45 (0.78 - 2.70) | 1.77 (0.87 - 3.58) | 2.38 (1.27 - 4.45)  | 0.006   |
| Masked 24-hour hypertension                                 | 1 (ref)                               | 1.97 (0.80 - 4.86) | 2.04 (0.68 - 6.09) | 2.75 (1.01 - 7.45)  | 0.078   |
| <b>Among participants with prehypertension</b>              | n=100                                 | n=57               | n=48               | n=205               |         |
|                                                             | Prevalence                            |                    |                    |                     |         |
| Any masked hypertension                                     | 52.0%                                 | 54.4%              | 64.6%              | 70.7%               | 0.001   |
| Masked daytime hypertension                                 | 34.0%                                 | 29.8%              | 35.4%              | 47.3%               | 0.009   |
| Masked nighttime hypertension                               | 49.0%                                 | 47.4%              | 60.4%              | 65.4%               | 0.002   |
| Masked 24-hour hypertension                                 | 35.0%                                 | 31.6%              | 41.7%              | 52.7%               | 0.001   |
|                                                             | Unadjusted prevalence ratio (95% CI)  |                    |                    |                     |         |
| Any masked hypertension                                     | 1 (ref)                               | 1.05 (0.77 - 1.42) | 1.24 (0.94 - 1.65) | 1.36 (1.10 - 1.67)  | 0.001   |
| Masked daytime hypertension                                 | 1 (ref)                               | 0.88 (0.54 - 1.42) | 1.04 (0.65 - 1.67) | 1.39 (1.02 - 1.90)  | 0.012   |
| Masked nighttime hypertension                               | 1 (ref)                               | 0.97 (0.69 - 1.36) | 1.23 (0.91 - 1.67) | 1.33 (1.07 - 1.67)  | 0.003   |

|                               |                                     |                    |                    |                    |       |
|-------------------------------|-------------------------------------|--------------------|--------------------|--------------------|-------|
| Masked 24-hour hypertension   | 1 (ref)                             | 0.90 (0.57 - 1.44) | 1.19 (0.78 - 1.83) | 1.51 (1.12 - 2.03) | 0.001 |
|                               | Adjusted prevalence ratio (95% CI)* |                    |                    |                    |       |
| Any masked hypertension       | 1 (ref)                             | 1.06 (0.77 - 1.44) | 1.29 (0.94 - 1.75) | 1.42 (1.07 - 1.89) | 0.007 |
| Masked daytime hypertension   | 1 (ref)                             | 0.98 (0.60 - 1.61) | 1.20 (0.73 - 1.97) | 1.72 (1.11 - 2.66) | 0.006 |
| Masked nighttime hypertension | 1 (ref)                             | 0.89 (0.63 - 1.27) | 1.11 (0.79 - 1.57) | 1.13 (0.81 - 1.58) | 0.282 |
| Masked 24-hour hypertension   | 1 (ref)                             | 0.94 (0.58 - 1.51) | 1.22 (0.78 - 1.90) | 1.55 (1.02 - 2.35) | 0.013 |

ASCVD: Atherosclerotic cardiovascular disease

CI: Confidence interval

Normal clinic blood pressure is defined as mean clinic systolic blood pressure <120 mm Hg and mean clinic diastolic blood pressure <80 mm Hg. Prehypertension is defined as mean clinic systolic blood pressure 120 to 139 mm Hg or mean clinic diastolic blood pressure 80 to 89 mm Hg.

\*Adjusted for age, sex, body mass index, less than high school education, and estimated glomerular filtration rate <60 ml/min/m<sup>2</sup>

**Supplemental Table 7.** C-statistic for masked hypertension using 10-year predicted atherosclerotic cardiovascular disease (ASCVD) risk compared with clinic systolic blood pressure (SBP) and diastolic blood pressure (DBP), clinic SBP alone, and clinic DBP alone among Jackson Heart Study participants not taking and taking antihypertensive medication in adjusted models.

|                                                     | Adjusted c-statistic*              |                        |                        |                        | Difference in c-statistic (95% CI)          |                                           |                                     |
|-----------------------------------------------------|------------------------------------|------------------------|------------------------|------------------------|---------------------------------------------|-------------------------------------------|-------------------------------------|
|                                                     | 10-year predicted ASCVD Risk Score | Clinic SBP and DBP     | Clinic SBP             | Clinic DBP             | Clinic SBP and DBP versus ASCVD risk score† | Clinic SBP versus ASCVD risk score‡       | Clinic DBP versus ASCVD risk score§ |
| Participants not taking antihypertensive medication |                                    |                        |                        |                        |                                             |                                           |                                     |
| Any masked hypertension                             | 0.655 (0.593 to 0.718)             | 0.740 (0.684 to 0.797) | 0.740 (0.684 to 0.797) | 0.656 (0.594 to 0.718) | <b>0.085</b><br>( <b>0.037 to 0.150</b> )   | <b>0.085</b><br>( <b>0.038 to 0.154</b> ) | 0.001<br>(-0.054 to 0.056)          |
| Masked daytime hypertension                         | 0.682 (0.636 to 0.728)             | 0.721 (0.680 to 0.763) | 0.721 (0.679 to 0.762) | 0.651 (0.606 to 0.697) | <b>0.039</b><br>( <b>0.000 to 0.030</b> )   | 0.039<br>(-0.006 to 0.031)                | -0.031<br>(-0.107 to -0.013)        |
| Masked nighttime hypertension                       | 0.664 (0.621 to 0.706)             | 0.689 (0.648 to 0.730) | 0.689 (0.648 to 0.730) | 0.646 (0.603 to 0.689) | 0.025<br>(-0.010 to 0.034)                  | 0.025<br>(-0.010 to 0.037)                | -0.018<br>(-0.095 to 0.009)         |
| Masked 24-hour hypertension                         | 0.696 (0.652 to 0.739)             | 0.732 (0.691 to 0.772) | 0.730 (0.690 to 0.771) | 0.662 (0.618 to 0.707) | 0.036<br>(-0.010 to 0.044)                  | 0.035<br>(-0.025 to 0.051)                | -0.033<br>(-0.112 to 0.001)         |
| Participants taking antihypertensive medication     |                                    |                        |                        |                        |                                             |                                           |                                     |
| Any masked hypertension                             | 0.697 (0.641 to 0.754)             | 0.689 (0.632 to 0.747) | 0.690 (0.632 to 0.747) | 0.664 (0.606 to 0.723) | -0.008<br>(-0.056 to 0.026)                 | -0.008<br>(-0.050 to 0.031)               | -0.033<br>(-0.082 to 0.006)         |
| Masked daytime hypertension                         | 0.682 (0.636 to 0.728)             | 0.721 (0.680 to 0.763) | 0.721 (0.679 to 0.762) | 0.651 (0.606 to 0.697) | <b>0.039</b><br>( <b>0.041 to 0.095</b> )   | <b>0.039</b><br>( <b>0.043 to 0.094</b> ) | -0.031<br>(-0.061 to 0.022)         |
| Masked nighttime hypertension                       | 0.664 (0.621 to 0.706)             | 0.689 (0.648 to 0.730) | 0.689 (0.648 to 0.730) | 0.646 (0.603 to 0.689) | <b>0.025</b><br>( <b>0.013 to 0.064</b> )   | <b>0.025</b><br>( <b>0.016 to 0.053</b> ) | -0.018<br>(-0.050 to 0.028)         |
| Masked 24-hour hypertension                         | 0.696 (0.652 to 0.739)             | 0.732 (0.691 to 0.772) | 0.730 (0.690 to 0.771) | 0.662 (0.618 to 0.707) | <b>0.036</b><br>( <b>0.031 to 0.076</b> )   | <b>0.035</b><br>( <b>0.034 to 0.071</b> ) | -0.033<br>(-0.068 to 0.005)         |

Statistically significant differences versus ASCVD risk score are shown in bold.

ASCVD: Atherosclerotic cardiovascular disease

CI: Confidence interval

\*Adjusted for age, sex, body mass index, less than high school education, and estimated glomerular filtration rate <60 ml/min/m<sup>2</sup>

†Comparing clinic SBP and DBP to 10-year predicted ASCVD Risk Score

‡Comparing clinic SBP to 10-year predicted ASCVD Risk Score

§Comparing clinic DBP to 10-year predicted ASCVD Risk Score

SBP: Systolic blood pressure

DBP: Diastolic blood pressure

**SUPPLEMENTAL FIGURES**

**Supplemental Figure 1.** Prevalence of 10-year predicted atherosclerotic cardiovascular disease risk categories among participants with and without masked hypertension stratified by those not taking antihypertensive medication (upper panel) and those taking antihypertensive medication (lower panel). The prevalence data, depicted here, are presented in Supplemental Table 5.

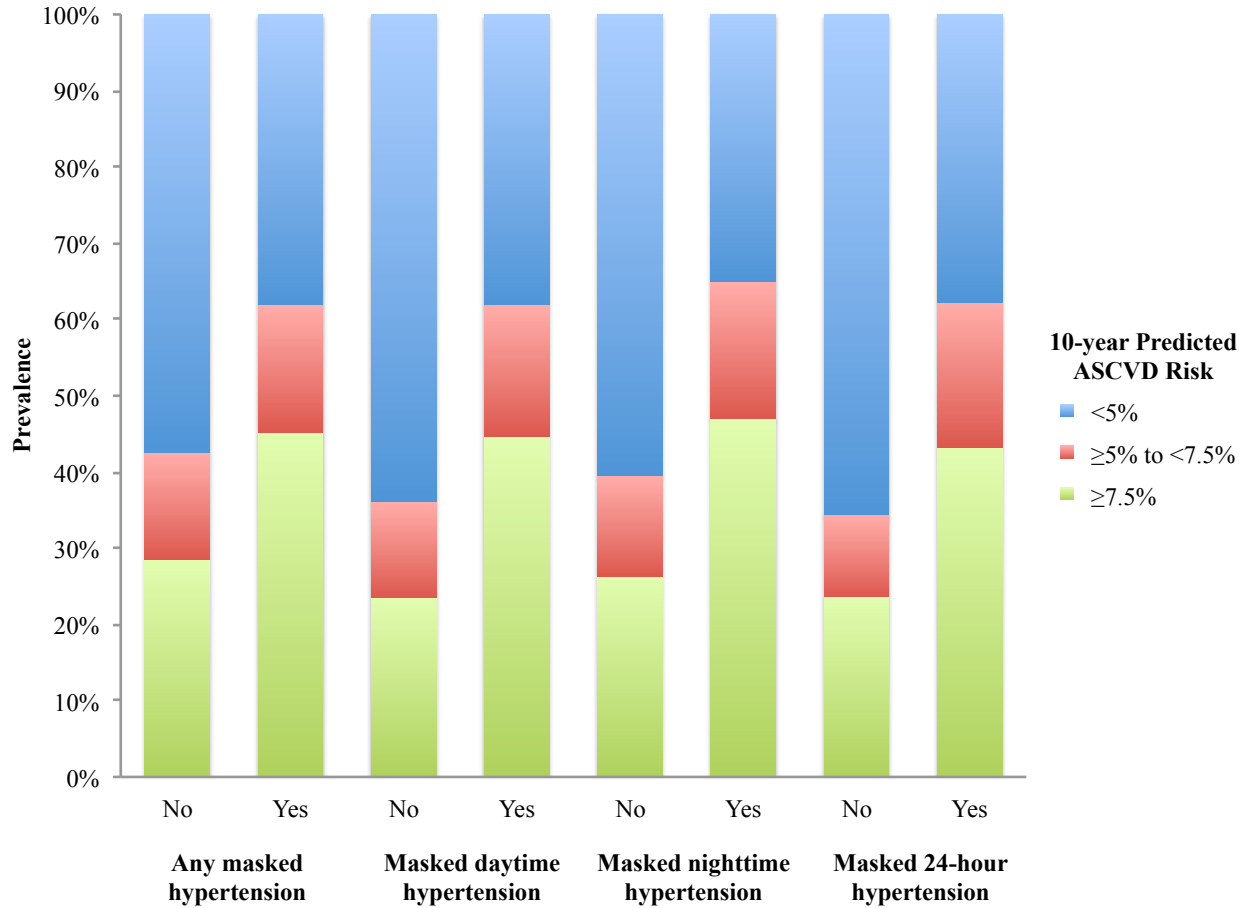

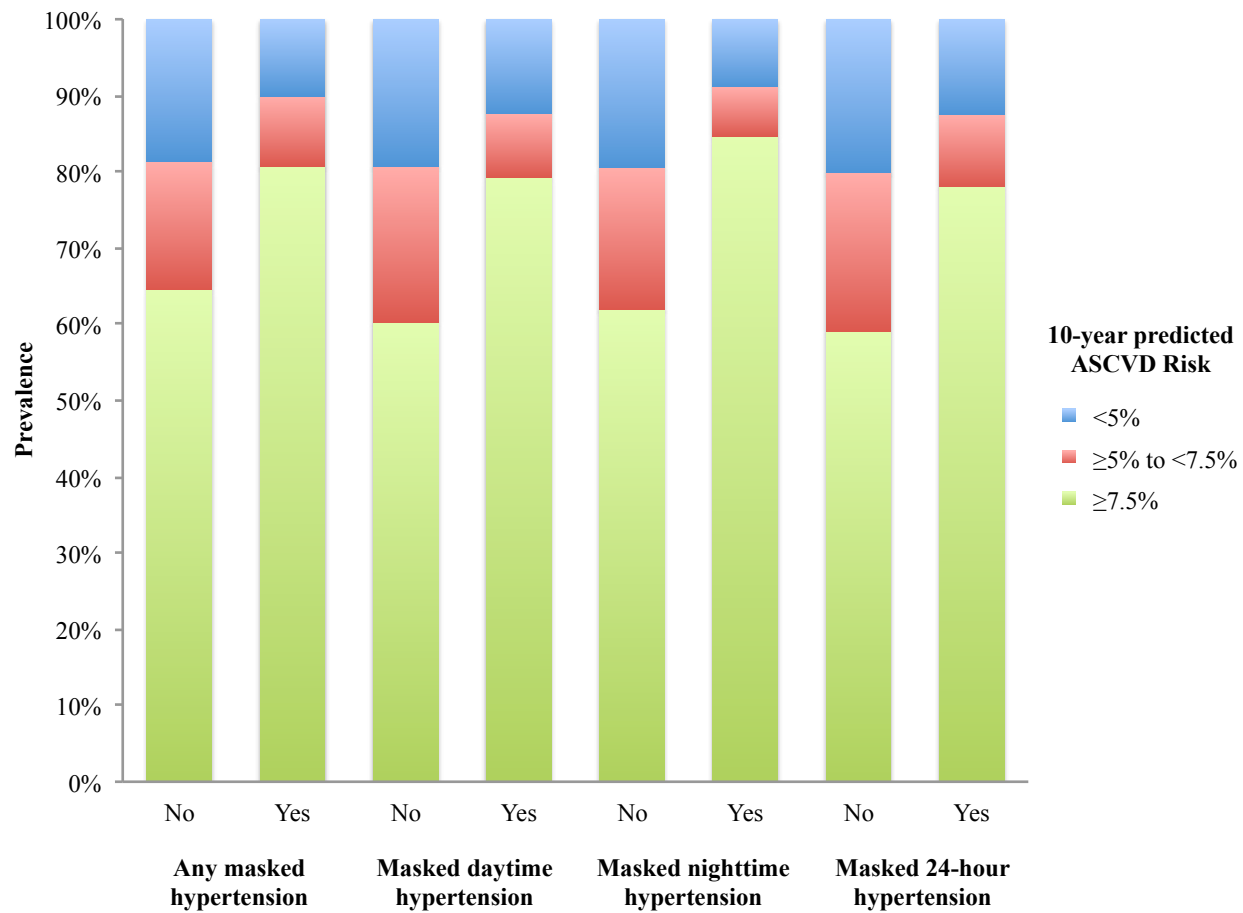

Supplement: NIHMS883563-supplement-Supplemental_Tables_and_Figures.pdf [file NIHMS883563-supplement-Supplemental_Tables_and_Figures.pdf]
